# Supplementary material for: Comparative efficacy of pharmacological and nonpharmacological treatments for chronic idiopathic constipation in China: a Bayesian network meta-analysis
Source: Springer Nature journal article supplement (doi:10.1186/s12906-019-2741-z), 2019-11-14
Supplement: MOESM2 [file 17388582]

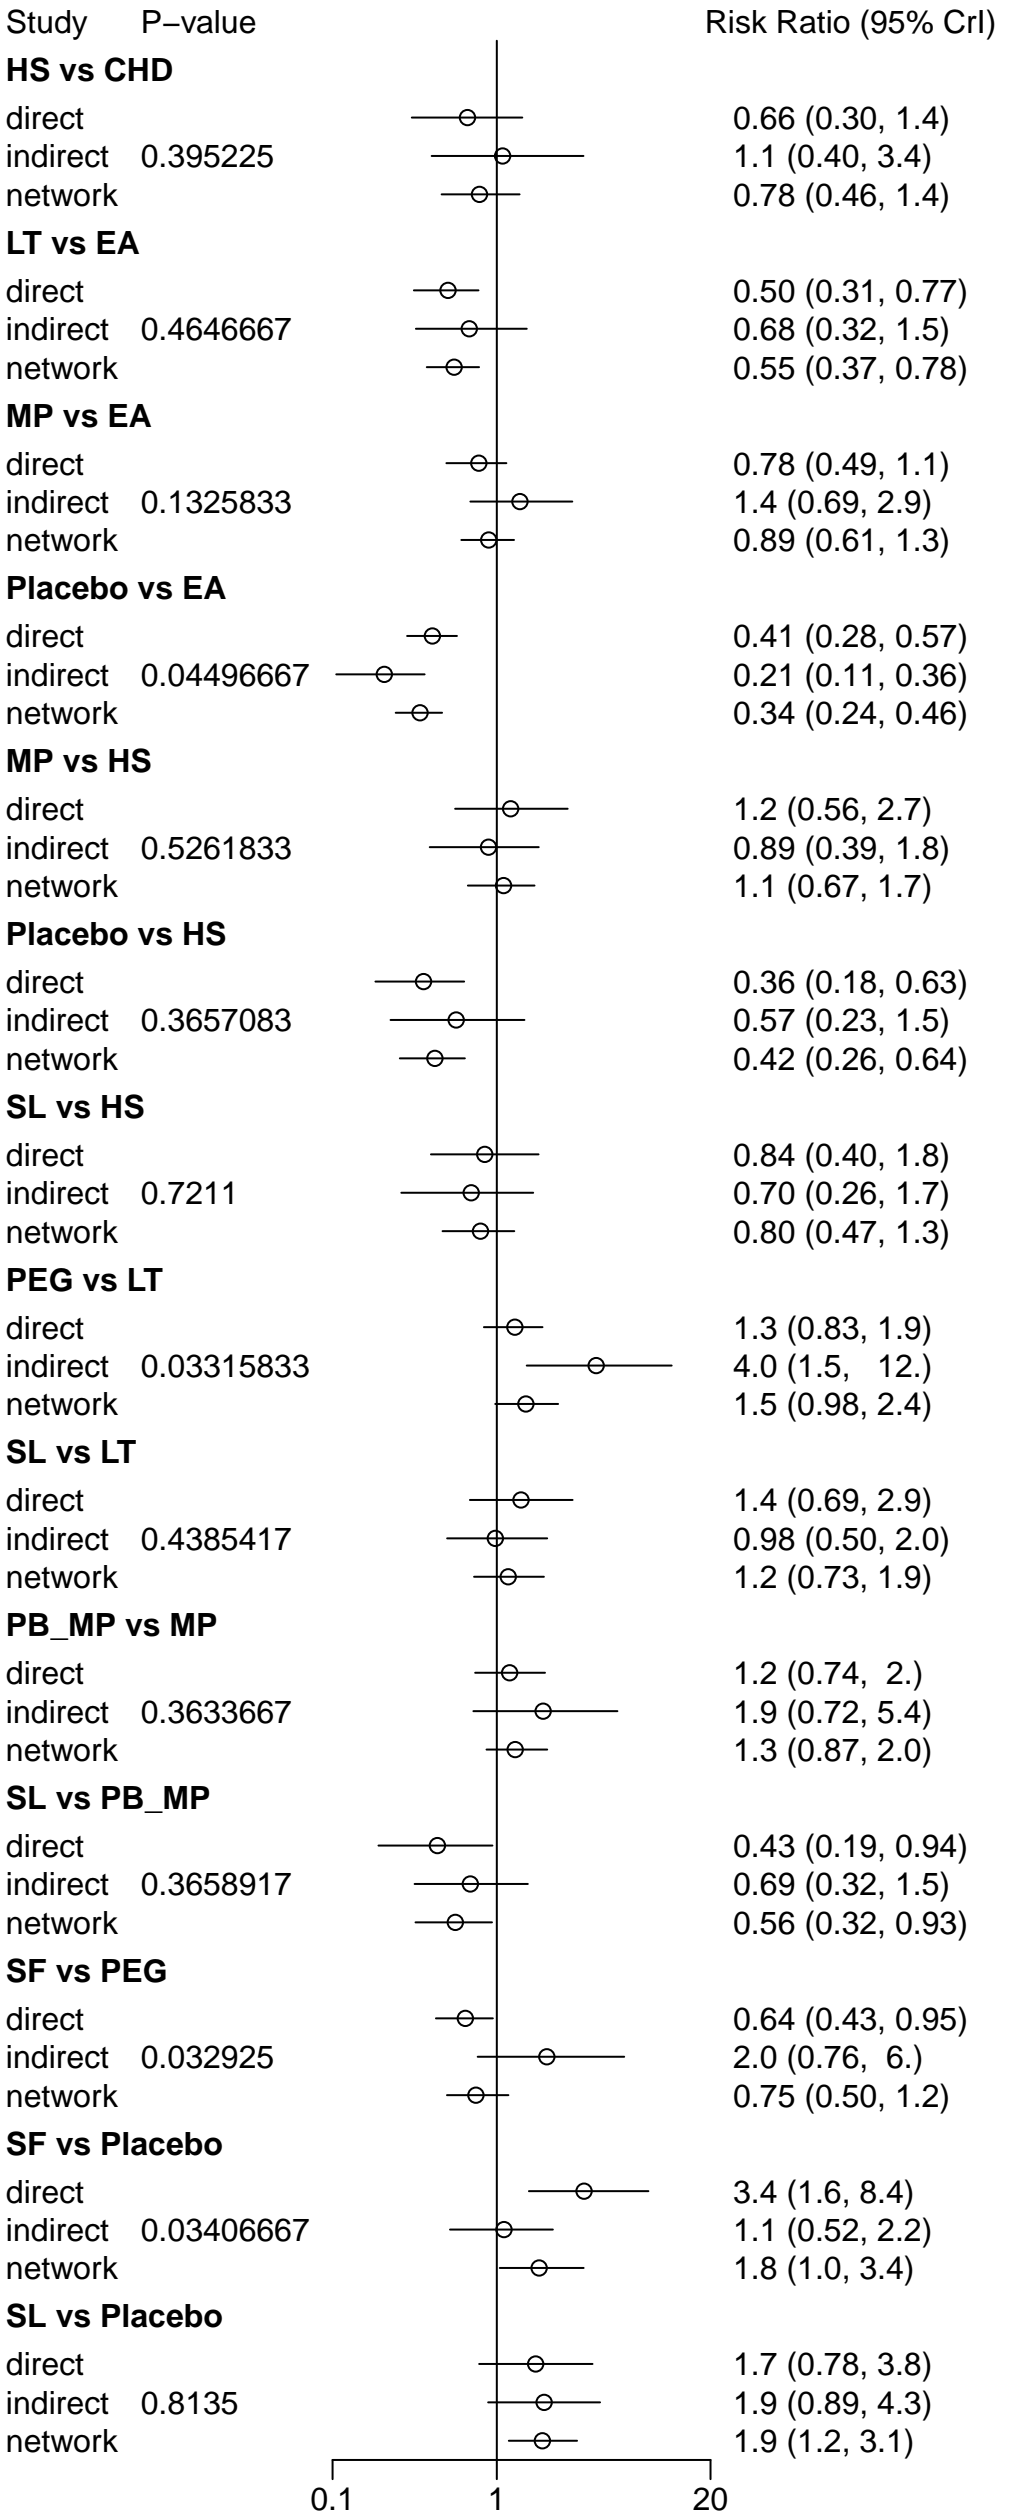

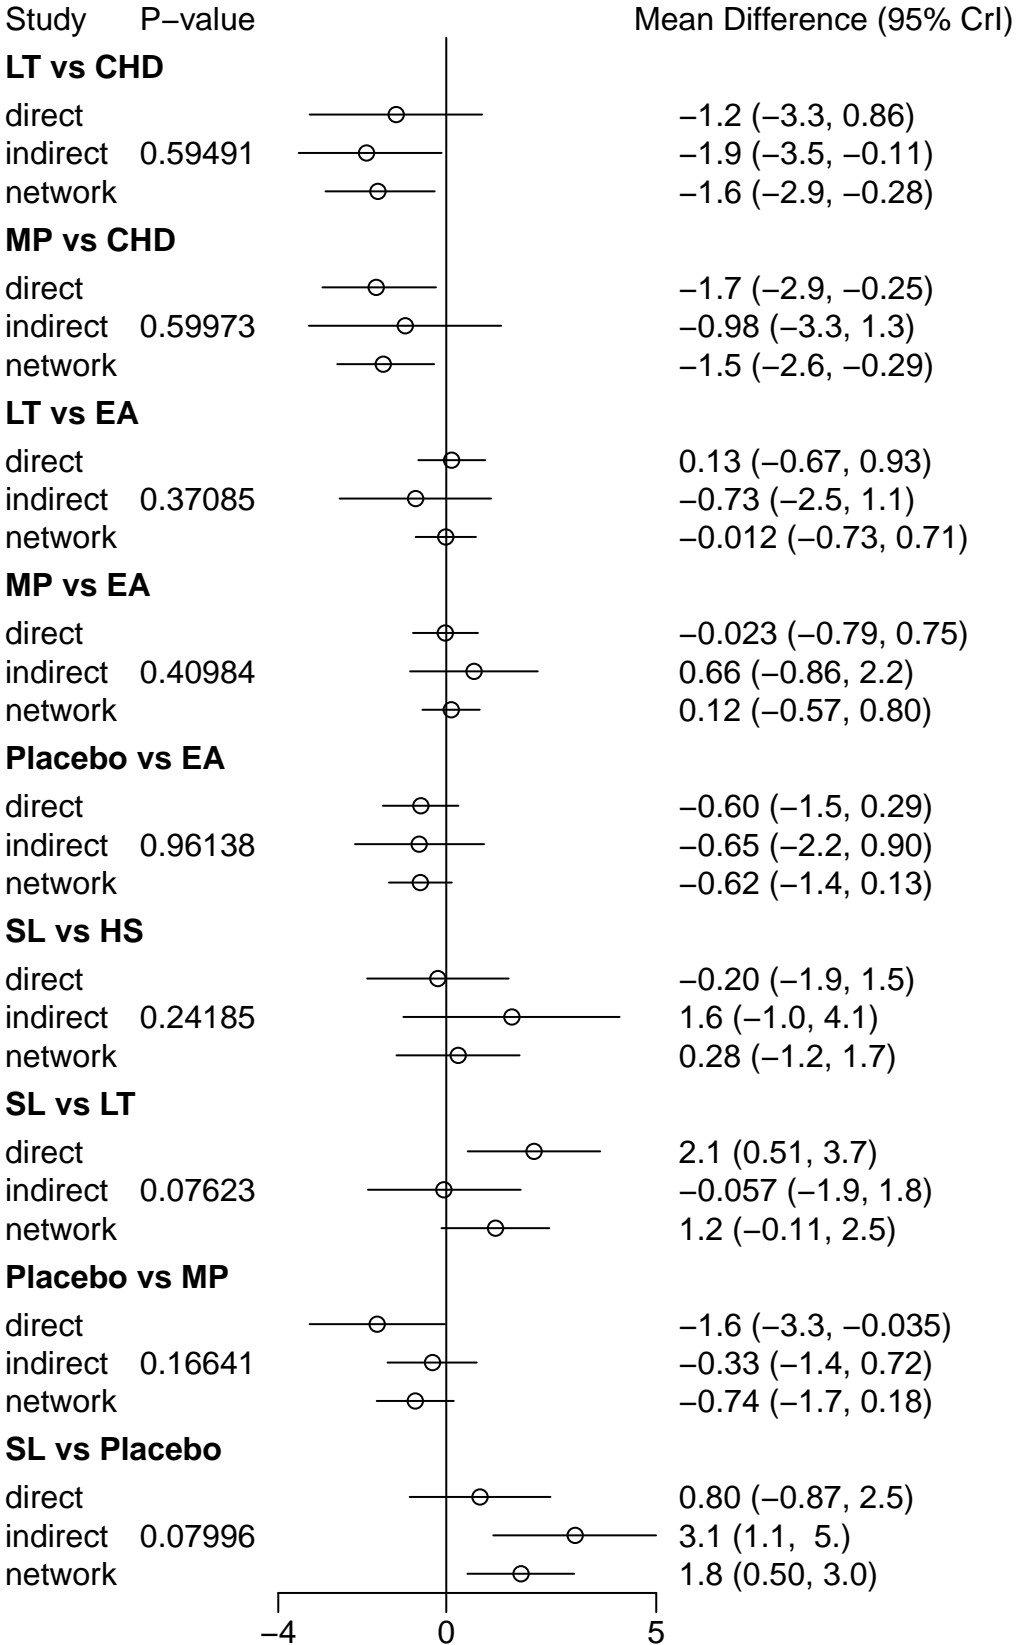

### Median Rank

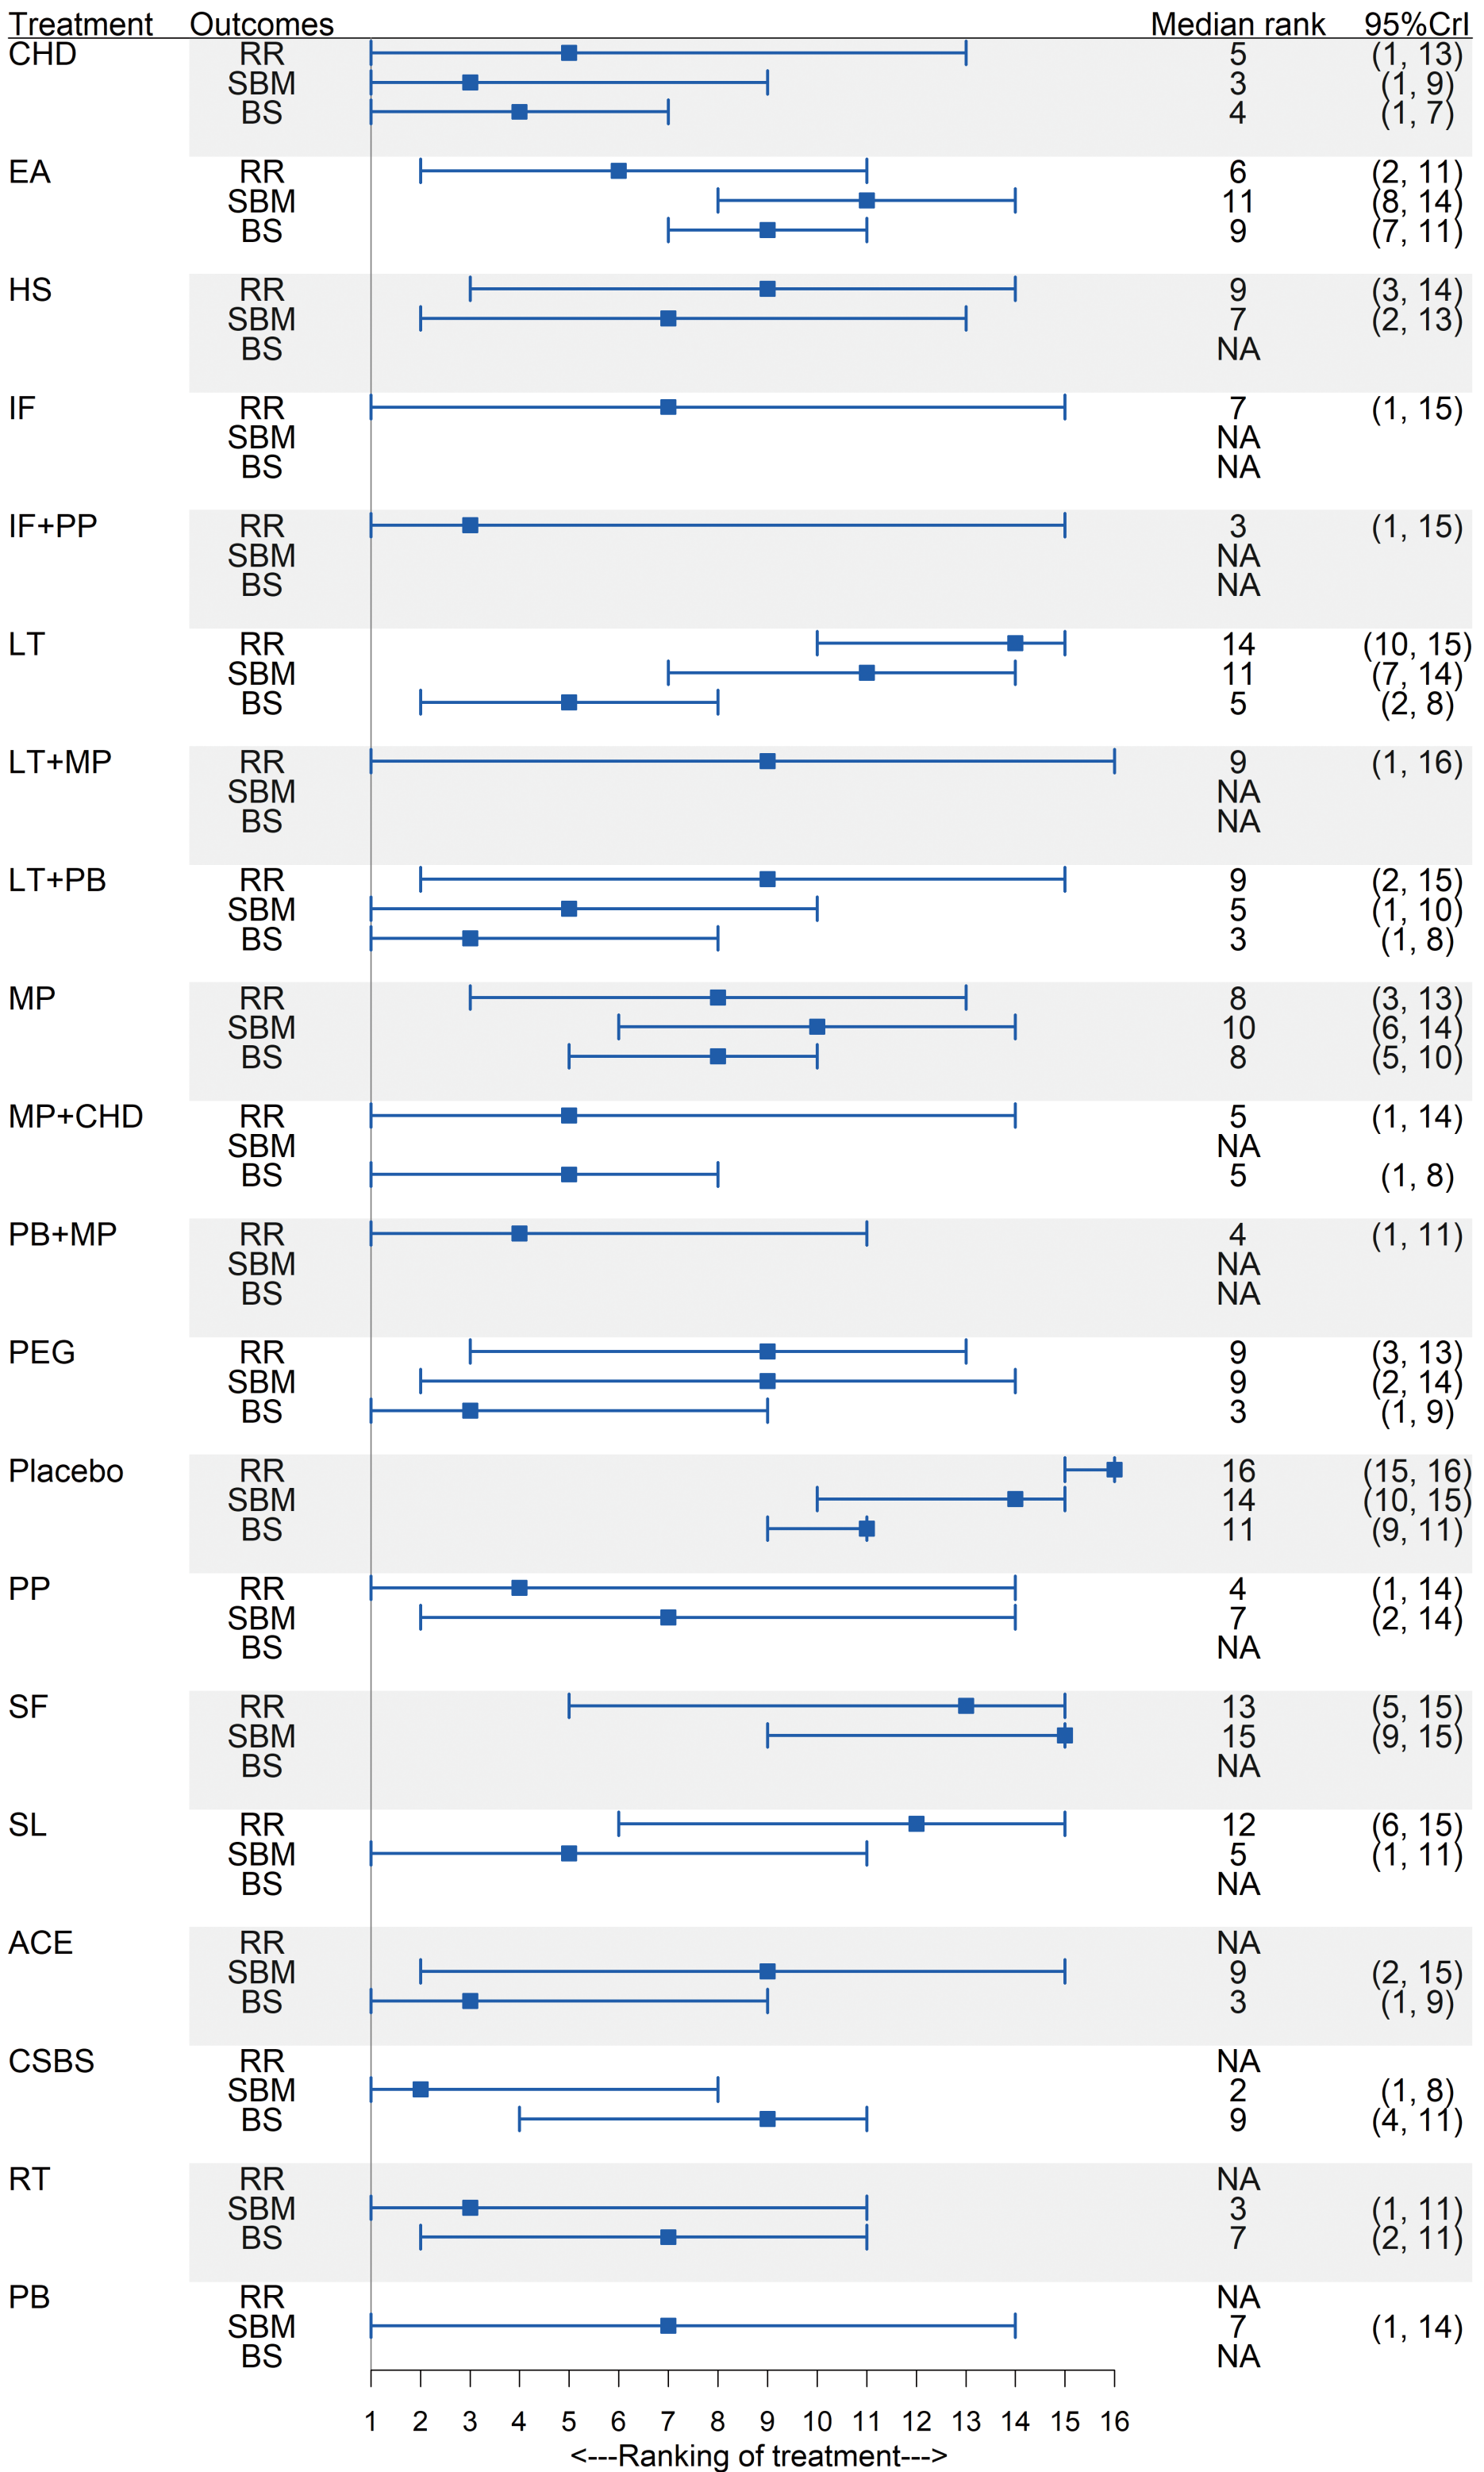

<---Ranking of treatment--->
